# Supplementary material for: Self-Administration of Burosumab in Children and Adults with X-Linked Hypophosphataemia in Two Open-Label, Single-Arm Clinical Studies
Source: Springer Nature journal article supplement (doi:10.1007/s12325-022-02412-x), 2023-01-31
Supplement: MOESM1 [file 23974744]

## **Self-administration of burosumab in children and adults with X-linked hypophosphataemia in two open-label, single-arm clinical studies**

Takuo Kubota<sup>1</sup>, Noriyuki Namba<sup>2</sup>, Hiroyuki Tanaka<sup>3</sup>, Koji Muroya<sup>4</sup>, Yasuo Imanishi<sup>5</sup>, Yasuhiro Takeuchi<sup>6,7</sup>, Masanori Kanematsu<sup>8</sup> (corresponding author), Wei Sun<sup>9</sup>, Yoshiki Seino<sup>10</sup> and Keiichi Ozono<sup>1</sup>

### **Affiliations**

1. Department of Paediatrics, Osaka University Graduate School of Medicine, Osaka, Japan
2. Division of Paediatrics and Perinatology, Tottori University Faculty of Medicine, Tottori, Japan
3. Department of Paediatrics, Okayama Saiseikai General Hospital, Okayama, Japan
4. Department of Endocrinology and Metabolism, Kanagawa Children's Medical Centre, Kanagawa, Japan
5. Department of Metabolism, Endocrinology and Molecular Medicine, Osaka Metropolitan University Graduate School of Medicine, Osaka, Japan
6. Endocrine Centre, Toranomon Hospital, Tokyo, Japan
7. Okinaka Memorial Institute for Medical Research, Tokyo, Japan
8. Kyowa Kirin Co., Ltd. Oteomachi Financial City Grand Cube. 1-9-2 Otemachi, Chiyoda-ku, Tokyo, Japan
9. Kyowa Kirin, Inc. 212 Carnegie Centre, Princeton, NJ 08540, USA
10. Department of Paediatrics, Osaka Hospital, Japan Community Healthcare Organisation, Osaka, Japan

Correspondence: Masanori Kanematsu, Kyowa Kirin Co., Ltd. Oteomachi Financial City Grand Cube. 1-9-2 Otemachi, Chiyoda-ku, Tokyo, Japan.

Email: [masanori.kanematsu.vn@kyowakirin.com](mailto:masanori.kanematsu.vn@kyowakirin.com)

## SUPPLEMENTARY DATA

### Self-administration of burosumab in children and adults with X-linked hypophosphataemia in two open-label, single-arm clinical studies

#### PAEDIATRIC DATA

##### KRN23-003 and KRN23-004 (paediatrics): Baseline characteristics of patients with self-administration

| Characteristic                                      | KRN23-003 (n=15) | KRN23-004 (n=5)  | Total (n=20)     |
|-----------------------------------------------------|------------------|------------------|------------------|
| Age, years, mean $\pm$ SD                           | 6.7 $\pm$ 3.2    | 9.2 $\pm$ 3.9    | 7.4 $\pm$ 3.4    |
| Female, n (%)                                       | 13 (86.7)        | 1 (20.0)         | 14 (70.0)        |
| Weight, kg, mean $\pm$ SD                           | 20.9 $\pm$ 7     | 28.9 $\pm$ 14.1  | 22.9 $\pm$ 9.5   |
| Height, cm, mean $\pm$ SD                           | 113.8 $\pm$ 20.2 | 122.2 $\pm$ 22.6 | 115.9 $\pm$ 20.5 |
| Serum phosphate, mg/dL, mean $\pm$ SD               | 2.6 $\pm$ 0.3    | 2.2 $\pm$ 0.4    | 2.5 $\pm$ 0.4    |
| TmP/GFR, mg/dL, mean $\pm$ SD                       | 2.4 $\pm$ 0.5    | 2.0 $\pm$ 0.6    | 2.3 $\pm$ 0.5    |
| Serum 1,25(OH) <sub>2</sub> D, pg/mL, mean $\pm$ SD | 24.7 $\pm$ 12.7  | 43.2 $\pm$ 23.3  | 29.3 $\pm$ 17.3  |
| Serum iFGF23, pg/mL, mean $\pm$ SD                  | 182.6 $\pm$ 67.3 | N/A              | 182.6 $\pm$ 67.3 |

**KRN23-003 (Paediatrics): Baseline characteristics of patients with self-administration – genetic analysis**

| Parameter (unit)     |          | KRN23-003 (n=15) |
|----------------------|----------|------------------|
| PHEX mutation, n (%) | Positive | 13 (86.7)        |
|                      | Undone   | 2 (13.3)         |
|                      | Other    | 0                |

**KRN23-003 and KRN23-004 (paediatrics): Summary of drug exposure of patients with self-administration**

| Parameter (unit)                        |        | KRN23 (N=20) |
|-----------------------------------------|--------|--------------|
| Duration of prescribed treatment (week) | n      | 20           |
|                                         | Mean   | 105.860      |
|                                         | SD     | 16.678       |
|                                         | Min    | 73.90        |
|                                         | Median | 114.800      |
|                                         | Max    | 119.90       |
| Prescribed dose (mg)                    | n      | 1076         |
|                                         | Mean   | 20.263       |
|                                         | SD     | 7.990        |
|                                         | Min    | 7.52         |
|                                         | Median | 17.360       |
|                                         | Max    | 51.00        |

**KRN23-003 and KRN23-004 (paediatrics): Serum phosphate over time of patients with self-administration**

| Parameter (unit)  | Visit    | KRN23 (paediatrics) |        |
|-------------------|----------|---------------------|--------|
|                   |          | N=20                | Actual |
| Phosphate (mg/dL) | Baseline | n                   | 20     |
|                   |          | Mean                | 2.51   |
|                   |          | SD                  | 0.38   |
|                   |          | Min                 | 1.7    |
|                   |          | Median              | 2.60   |
|                   |          | Max                 | 3.0    |
|                   | Week 1   | n                   | 15     |
|                   |          | Mean                | 3.67   |
|                   |          | SD                  | 0.48   |
|                   |          | Min                 | 2.9    |
|                   |          | Median              | 3.70   |
|                   |          | Max                 | 4.5    |
|                   | Week 2   | n                   | 18     |
|                   |          | Mean                | 3.53   |
|                   |          | SD                  | 0.59   |
|                   |          | Min                 | 2.5    |
|                   |          | Median              | 3.50   |
|                   |          | Max                 | 4.7    |
|                   | Week 4   | n                   | 18     |
|                   |          | Mean                | 3.66   |
| SD                |          | 0.60                |        |
| Min               |          | 2.7                 |        |
| Median            |          | 3.60                |        |
| Max               |          | 4.8                 |        |

| Parameter (unit)  | Visit   | KRN23 (paediatrics) |        |
|-------------------|---------|---------------------|--------|
|                   |         | N=20                | Actual |
| Phosphate (mg/dL) | Week 8  | n                   | 20     |
|                   |         | Mean                | 3.48   |
|                   |         | SD                  | 0.47   |
|                   |         | Min                 | 2.8    |
|                   |         | Median              | 3.40   |
|                   |         | Max                 | 4.6    |
|                   | Week 12 | n                   | 20     |
|                   |         | Mean                | 3.40   |
|                   |         | SD                  | 0.54   |
|                   |         | Min                 | 2.7    |
|                   |         | Median              | 3.20   |
|                   |         | Max                 | 4.6    |
|                   | Week 16 | n                   | 20     |
|                   |         | Mean                | 3.38   |
|                   |         | SD                  | 0.51   |
|                   |         | Min                 | 2.5    |
|                   |         | Median              | 3.30   |
|                   |         | Max                 | 4.4    |
|                   | Week 20 | n                   | 15     |
|                   |         | Mean                | 3.28   |
| SD                |         | 0.62                |        |
| Min               |         | 2.4                 |        |
| Median            |         | 3.20                |        |
| Max               |         | 4.3                 |        |

| Parameter (unit)  | Visit   | KRN23 (paediatrics) |        |
|-------------------|---------|---------------------|--------|
|                   |         | N=20                | Actual |
| Phosphate (mg/dL) | Week 24 | n                   | 20     |
|                   |         | Mean                | 3.29   |
|                   |         | SD                  | 0.49   |
|                   |         | Min                 | 2.5    |
|                   |         | Median              | 3.20   |
|                   |         | Max                 | 4.2    |
|                   | Week 28 | n                   | 15     |
|                   |         | Mean                | 3.50   |
|                   |         | SD                  | 0.46   |
|                   |         | Min                 | 2.7    |
|                   |         | Median              | 3.40   |
|                   |         | Max                 | 4.3    |
|                   | Week 32 | n                   | 15     |
|                   |         | Mean                | 3.53   |
|                   |         | SD                  | 0.43   |
|                   |         | Min                 | 3.0    |
|                   |         | Median              | 3.30   |
|                   |         | Max                 | 4.2    |
|                   | Week 36 | n                   | 20     |
|                   |         | Mean                | 3.40   |
| SD                |         | 0.34                |        |
| Min               |         | 2.8                 |        |
| Median            |         | 3.35                |        |
| Max               |         | 3.9                 |        |

| Parameter (unit)  | Visit   | KRN23 (paediatrics) |        |
|-------------------|---------|---------------------|--------|
|                   |         | N=20                | Actual |
| Phosphate (mg/dL) | Week 40 | n                   | 15     |
|                   |         | Mean                | 3.51   |
|                   |         | SD                  | 0.45   |
|                   |         | Min                 | 2.8    |
|                   |         | Median              | 3.40   |
|                   |         | Max                 | 4.3    |
|                   | Week 48 | n                   | 4      |
|                   |         | Mean                | 2.90   |
|                   |         | SD                  | 0.29   |
|                   |         | Min                 | 2.6    |
|                   |         | Median              | 2.85   |
|                   |         | Max                 | 3.3    |
|                   | Week 52 | n                   | 15     |
|                   |         | Mean                | 3.53   |
|                   |         | SD                  | 0.52   |
|                   |         | Min                 | 2.8    |
|                   |         | Median              | 3.30   |
|                   |         | Max                 | 4.7    |
|                   | Week 60 | n                   | 5      |
|                   |         | Mean                | 2.86   |
| SD                |         | 0.30                |        |
| Min               |         | 2.5                 |        |
| Median            |         | 2.90                |        |
| Max               |         | 3.3                 |        |

| Parameter (unit)  | Visit   | KRN23 (paediatrics) |        |
|-------------------|---------|---------------------|--------|
|                   |         | N=20                | Actual |
| Phosphate (mg/dL) | Week 64 | n                   | 15     |
|                   |         | Mean                | 3.49   |
|                   |         | SD                  | 0.46   |
|                   |         | Min                 | 2.7    |
|                   |         | Median              | 3.30   |
|                   |         | Max                 | 4.1    |
|                   | Week 72 | n                   | 5      |
|                   |         | Mean                | 3.10   |
|                   |         | SD                  | 0.34   |
|                   |         | Min                 | 2.7    |
|                   |         | Median              | 3.00   |
|                   |         | Max                 | 3.5    |
|                   | Week 76 | n                   | 15     |
|                   |         | Mean                | 3.44   |
|                   |         | SD                  | 0.46   |
|                   |         | Min                 | 2.5    |
|                   |         | Median              | 3.40   |
|                   |         | Max                 | 4.1    |
|                   | Week 84 | n                   | 1      |
|                   |         | Mean                | 3.30   |
|                   |         | SD                  | -      |
| Min               |         | 3.3                 |        |
| Median            |         | 3.30                |        |
| Max               |         | 3.3                 |        |



| Parameter (unit)  | Visit    | KRN23 (paediatrics) |        |
|-------------------|----------|---------------------|--------|
|                   |          | N=20                | Actual |
| Phosphate (mg/dL) | Week 88  | n                   | 13     |
|                   |          | Mean                | 3.55   |
|                   |          | SD                  | 0.51   |
|                   |          | Min                 | 2.6    |
|                   |          | Median              | 3.40   |
|                   |          | Max                 | 4.3    |
|                   | Week 100 | n                   | 15     |
|                   |          | Mean                | 3.47   |
|                   |          | SD                  | 0.41   |
|                   |          | Min                 | 2.7    |
|                   |          | Median              | 3.50   |
|                   |          | Max                 | 4.2    |
|                   | Week 112 | n                   | 14     |
|                   |          | Mean                | 3.62   |
|                   |          | SD                  | 0.47   |
|                   |          | Min                 | 2.6    |
|                   |          | Median              | 3.70   |
|                   |          | Max                 | 4.3    |
|                   | Week 124 | n                   | 3      |
|                   |          | Mean                | 3.83   |
|                   |          | SD                  | 0.25   |
| Min               |          | 3.6                 |        |
| Median            |          | 3.80                |        |
| Max               |          | 4.1                 |        |

| Parameter (unit)  | Visit            | KRN23 (paediatrics) |        |
|-------------------|------------------|---------------------|--------|
|                   |                  | N=20                | Actual |
| Phosphate (mg/dL) | End of study     | n                   | 5      |
|                   |                  | Mean                | 2.94   |
|                   |                  | SD                  | 0.29   |
|                   |                  | Min                 | 2.5    |
|                   |                  | Median              | 3.10   |
|                   |                  | Max                 | 3.2    |
|                   | End of treatment | n                   | 14     |
|                   |                  | Mean                | 3.58   |
|                   |                  | SD                  | 0.36   |
|                   |                  | Min                 | 3.0    |
|                   |                  | Median              | 3.60   |
|                   |                  | Max                 | 4.2    |
|                   | Withdrawal       | n                   | 1      |
|                   |                  | Mean                | 3.40   |
|                   |                  | SD                  | -      |
|                   |                  | Min                 | 3.4    |
|                   |                  | Median              | 3.40   |
|                   |                  | Max                 | 3.4    |

**KRN23-003 and KRN23-004 (paediatrics): TmP/GFR (2-hour urine) over time of patients with self-administration**

| Parameter (unit)               | Visit    | KRN23 (paediatrics) |        |
|--------------------------------|----------|---------------------|--------|
|                                |          | N=20                | Actual |
| TmP/GFR (2-hour urine) (mg/dL) | Baseline | n                   | 20     |
|                                |          | Mean                | 2.3304 |
|                                |          | SD                  | 0.5389 |
|                                |          | Min                 | 1.445  |
|                                |          | Median              | 2.2910 |
|                                |          | Max                 | 3.341  |
|                                | Week 4   | n                   | 18     |
|                                |          | Mean                | 3.8372 |
|                                |          | SD                  | 0.8688 |
|                                |          | Min                 | 2.543  |
|                                |          | Median              | 3.4730 |
|                                |          | Max                 | 5.596  |
|                                | Week 8   | n                   | 18     |
|                                |          | Mean                | 3.8752 |
|                                |          | SD                  | 0.8233 |
|                                |          | Min                 | 2.663  |
|                                |          | Median              | 3.7500 |
|                                |          | Max                 | 5.320  |
|                                | Week 16  | n                   | 18     |
|                                |          | Mean                | 3.5732 |
| SD                             |          | 0.8118              |        |
| Min                            |          | 2.355               |        |
| Median                         |          | 3.3270              |        |
| Max                            |          | 5.046               |        |

| Parameter (unit)               | Visit   | KRN23 (paediatrics) |        |
|--------------------------------|---------|---------------------|--------|
|                                |         | N=20                | Actual |
| TmP/GFR (2-hour urine) (mg/dL) | Week 24 | n                   | 15     |
|                                |         | Mean                | 3.6682 |
|                                |         | SD                  | 0.6753 |
|                                |         | Min                 | 2.759  |
|                                |         | Median              | 3.3420 |
|                                |         | Max                 | 4.693  |
|                                | Week 32 | n                   | 14     |
|                                |         | Mean                | 3.6571 |
|                                |         | SD                  | 0.7173 |
|                                |         | Min                 | 2.865  |
|                                |         | Median              | 3.3930 |
|                                |         | Max                 | 5.066  |
|                                | Week 40 | n                   | 15     |
|                                |         | Mean                | 3.6124 |
|                                |         | SD                  | 0.6072 |
|                                |         | Min                 | 2.346  |
|                                |         | Median              | 3.5040 |
|                                |         | Max                 | 4.571  |
|                                | Week 48 | n                   | 4      |
|                                |         | Mean                | 2.9600 |
| SD                             |         | 0.4425              |        |
| Min                            |         | 2.613               |        |
| Median                         |         | 2.8100              |        |
| Max                            |         | 3.607               |        |

| Parameter (unit)               | Visit   | KRN23 (paediatrics) |        |
|--------------------------------|---------|---------------------|--------|
|                                |         | N=20                | Actual |
| TmP/GFR (2-hour urine) (mg/dL) | Week 52 | n                   | 15     |
|                                |         | Mean                | 3.7705 |
|                                |         | SD                  | 0.7674 |
|                                |         | Min                 | 2.868  |
|                                |         | Median              | 3.6030 |
|                                |         | Max                 | 5.304  |
|                                | Week 64 | n                   | 15     |
|                                |         | Mean                | 3.7381 |
|                                |         | SD                  | 0.5467 |
|                                |         | Min                 | 2.528  |
|                                |         | Median              | 3.6330 |
|                                |         | Max                 | 4.468  |
|                                | Week 76 | n                   | 15     |
|                                |         | Mean                | 3.6089 |
|                                |         | SD                  | 0.5015 |
|                                |         | Min                 | 2.820  |
|                                |         | Median              | 3.5680 |
|                                |         | Max                 | 4.366  |
|                                | Week 88 | n                   | 13     |
|                                |         | Mean                | 3.7035 |
| SD                             |         | 0.7378              |        |
| Min                            |         | 2.577               |        |
| Median                         |         | 3.7460              |        |
| Max                            |         | 5.304               |        |

| Parameter (unit)               | Visit        | KRN23 (paediatrics) |        |
|--------------------------------|--------------|---------------------|--------|
|                                |              | N=20                | Actual |
| TmP/GFR (2-hour urine) (mg/dL) | Week 100     | n                   | 15     |
|                                |              | Mean                | 3.7209 |
|                                |              | SD                  | 0.5028 |
|                                |              | Min                 | 2.630  |
|                                |              | Median              | 3.8740 |
|                                |              | Max                 | 4.682  |
|                                | Week 112     | n                   | 13     |
|                                |              | Mean                | 3.8863 |
|                                |              | SD                  | 0.6296 |
|                                |              | Min                 | 2.835  |
|                                |              | Median              | 4.0550 |
|                                |              | Max                 | 4.861  |
|                                | Week 124     | n                   | 3      |
|                                |              | Mean                | 4.0430 |
|                                |              | SD                  | 0.5818 |
|                                |              | Min                 | 3.373  |
|                                |              | Median              | 4.3360 |
|                                |              | Max                 | 4.420  |
|                                | End of study | n                   | 5      |
|                                |              | Mean                | 2.9488 |
|                                |              | SD                  | 0.5689 |
| Min                            |              | 2.345               |        |
| Median                         |              | 3.0930              |        |
| Max                            |              | 3.570               |        |

| Parameter (unit)               | Visit            | KRN23 (paediatrics) |        |
|--------------------------------|------------------|---------------------|--------|
|                                |                  | N=20                | Actual |
| TmP/GFR (2-hour urine) (mg/dL) | End of treatment | n                   | 14     |
|                                |                  | Mean                | 3.8280 |
|                                |                  | SD                  | 0.5801 |
|                                |                  | Min                 | 2.807  |
|                                |                  | Median              | 3.9400 |
|                                |                  | Max                 | 4.958  |
|                                |                  | Max                 | 4.958  |
|                                | Withdrawal       | n                   | 1      |
|                                |                  | Mean                | 3.6740 |
|                                |                  | SD                  | -      |
|                                |                  | Min                 | 3.674  |
|                                |                  | Median              | 3.6740 |
|                                |                  | Max                 | 3.674  |
|                                |                  | Max                 | 3.674  |

**KRN23-003 and KRN23-004 (paediatrics): 1,25(OH)<sub>2</sub>D over time of patients with self-administration**

| Parameter (unit)                | Visit    | KRN23 (paediatrics) |        |
|---------------------------------|----------|---------------------|--------|
|                                 |          | N=20                | Actual |
| 1,25(OH) <sub>2</sub> D (pg/mL) | Baseline | n                   | 20     |
|                                 |          | Mean                | 29.30  |
|                                 |          | SD                  | 17.35  |
|                                 |          | Min                 | 5.1    |
|                                 |          | Median              | 26.35  |
|                                 |          | Max                 | 66.4   |
|                                 | Week 1   | n                   | 15     |
|                                 |          | Mean                | 70.81  |
|                                 |          | SD                  | 21.49  |
|                                 |          | Min                 | 36.8   |
|                                 |          | Median              | 65.40  |
|                                 |          | Max                 | 125.0  |
|                                 | Week 2   | n                   | 18     |
|                                 |          | Mean                | 64.87  |
|                                 |          | SD                  | 23.48  |
|                                 |          | Min                 | 41.6   |
|                                 |          | Median              | 60.90  |
|                                 |          | Max                 | 130.0  |
|                                 | Week 4   | n                   | 18     |
|                                 |          | Mean                | 64.48  |
| SD                              |          | 23.76               |        |
| Min                             |          | 38.5                |        |
| Median                          |          | 59.65               |        |
| Max                             |          | 127.0               |        |



| Parameter (unit)                | Visit   | KRN23 (paediatrics) |        |
|---------------------------------|---------|---------------------|--------|
|                                 |         | N=20                | Actual |
| 1,25(OH) <sub>2</sub> D (pg/mL) | Week 8  | n                   | 20     |
|                                 |         | Mean                | 60.87  |
|                                 |         | SD                  | 18.01  |
|                                 |         | Min                 | 40.8   |
|                                 |         | Median              | 54.80  |
|                                 |         | Max                 | 114.0  |
|                                 | Week 12 | n                   | 15     |
|                                 |         | Mean                | 55.43  |
|                                 |         | SD                  | 15.34  |
|                                 |         | Min                 | 38.7   |
|                                 |         | Median              | 55.60  |
|                                 |         | Max                 | 93.8   |
|                                 | Week 16 | n                   | 20     |
|                                 |         | Mean                | 62.94  |
|                                 |         | SD                  | 18.85  |
|                                 |         | Min                 | 42.6   |
|                                 |         | Median              | 58.95  |
|                                 |         | Max                 | 105.0  |
|                                 | Week 24 | n                   | 20     |
|                                 |         | Mean                | 60.36  |
| SD                              |         | 23.14               |        |
| Min                             |         | 37.0                |        |
| Median                          |         | 53.70               |        |
| Max                             |         | 130.0               |        |

| Parameter (unit)                | Visit   | KRN23 (paediatrics) |        |
|---------------------------------|---------|---------------------|--------|
|                                 |         | N=20                | Actual |
| 1,25(OH) <sub>2</sub> D (pg/mL) | Week 32 | n                   | 15     |
|                                 |         | Mean                | 53.11  |
|                                 |         | SD                  | 13.15  |
|                                 |         | Min                 | 35.4   |
|                                 |         | Median              | 55.80  |
|                                 |         | Max                 | 78.3   |
|                                 | Week 40 | n                   | 15     |
|                                 |         | Mean                | 62.19  |
|                                 |         | SD                  | 12.50  |
|                                 |         | Min                 | 43.1   |
|                                 |         | Median              | 64.90  |
|                                 |         | Max                 | 86.9   |
|                                 | Week 48 | n                   | 4      |
|                                 |         | Mean                | 107.95 |
|                                 |         | SD                  | 37.32  |
|                                 |         | Min                 | 67.2   |
|                                 |         | Median              | 106.80 |
|                                 |         | Max                 | 151.0  |
|                                 | Week 52 | n                   | 15     |
|                                 |         | Mean                | 61.75  |
|                                 |         | SD                  | 10.69  |
| Min                             |         | 44.6                |        |
| Median                          |         | 62.50               |        |
| Max                             |         | 81.4                |        |

| Parameter (unit)                | Visit    | KRN23 (paediatrics) |        |
|---------------------------------|----------|---------------------|--------|
|                                 |          | N=20                | Actual |
| 1,25(OH) <sub>2</sub> D (pg/mL) | Week 64  | n                   | 15     |
|                                 |          | Mean                | 60.35  |
|                                 |          | SD                  | 12.43  |
|                                 |          | Min                 | 42.8   |
|                                 |          | Median              | 59.70  |
|                                 |          | Max                 | 89.3   |
|                                 | Week 76  | n                   | 15     |
|                                 |          | Mean                | 62.67  |
|                                 |          | SD                  | 11.69  |
|                                 |          | Min                 | 43.7   |
|                                 |          | Median              | 63.40  |
|                                 |          | Max                 | 80.3   |
|                                 | Week 88  | n                   | 13     |
|                                 |          | Mean                | 60.84  |
|                                 |          | SD                  | 11.55  |
|                                 |          | Min                 | 41.7   |
|                                 |          | Median              | 62.50  |
|                                 |          | Max                 | 89.3   |
|                                 | Week 100 | n                   | 15     |
|                                 |          | Mean                | 64.05  |
|                                 |          | SD                  | 14.98  |
| Min                             |          | 38.2                |        |
| Median                          |          | 59.70               |        |
| Max                             |          | 91.2                |        |

| Parameter (unit)                | Visit            | KRN23 (paediatrics) |        |
|---------------------------------|------------------|---------------------|--------|
|                                 |                  | N=20                | Actual |
| 1,25(OH) <sub>2</sub> D (pg/mL) | Week 112         | n                   | 14     |
|                                 |                  | Mean                | 63.00  |
|                                 |                  | SD                  | 17.53  |
|                                 |                  | Min                 | 39.5   |
|                                 |                  | Median              | 62.10  |
|                                 |                  | Max                 | 92.9   |
|                                 | Week 124         | n                   | 3      |
|                                 |                  | Mean                | 59.60  |
|                                 |                  | SD                  | 20.16  |
|                                 |                  | Min                 | 40.4   |
|                                 |                  | Median              | 57.80  |
|                                 |                  | Max                 | 80.6   |
|                                 | End of study     | n                   | 5      |
|                                 |                  | Mean                | 80.90  |
|                                 |                  | SD                  | 14.69  |
|                                 |                  | Min                 | 61.7   |
|                                 |                  | Median              | 87.60  |
|                                 |                  | Max                 | 94.8   |
|                                 | End of treatment | n                   | 14     |
|                                 |                  | Mean                | 53.61  |
|                                 |                  | SD                  | 10.68  |
| Min                             |                  | 30.2                |        |
| Median                          |                  | 55.30               |        |
| Max                             |                  | 69.6                |        |

| Parameter (unit)                | Visit      | KRN23 (paediatrics) |        |
|---------------------------------|------------|---------------------|--------|
|                                 |            | N=20                | Actual |
| 1,25(OH) <sub>2</sub> D (pg/mL) | Withdrawal | n                   | 1      |
|                                 |            | Mean                | 87.20  |
|                                 |            | SD                  | -      |
|                                 |            | Min                 | 87.2   |
|                                 |            | Median              | 87.20  |
|                                 |            | Max                 | 87.2   |
|                                 |            |                     |        |

**KRN23-003 and KRN23-004 (paediatrics): Incidence of treatment-emergent adverse events (TEAE) in patients with self-administration**

| PT                                      | KRN23 (paediatrics)<br>N=20 |      |              |      |
|-----------------------------------------|-----------------------------|------|--------------|------|
|                                         | TEAE                        |      | Drug-related |      |
|                                         | n                           | (%)  | n            | (%)  |
| Any TEAE                                | 17                          | 85.0 | 2            | 10.0 |
| Adenoidal hypertrophy                   | 1                           | 5.0  | 0            | 0.0  |
| Arthropod sting                         | 1                           | 5.0  | 0            | 0.0  |
| Astigmatism                             | 1                           | 5.0  | 0            | 0.0  |
| Beta haemolytic streptococcal infection | 1                           | 5.0  | 0            | 0.0  |
| Blepharitis allergic                    | 1                           | 5.0  | 0            | 0.0  |
| Blood 25-hydroxycholecalciferol D       | 1                           | 5.0  | 1            | 5.0  |
| Bronchitis                              | 1                           | 5.0  | 0            | 0.0  |
| Chalazion                               | 1                           | 5.0  | 0            | 0.0  |
| Chronic sinusitis                       | 1                           | 5.0  | 0            | 0.0  |
| Conjunctivitis                          | 1                           | 5.0  | 0            | 0.0  |
| Constipation                            | 1                           | 5.0  | 0            | 0.0  |
| Contusion                               | 1                           | 5.0  | 0            | 0.0  |
| Croup infectious                        | 1                           | 5.0  | 0            | 0.0  |
| Dental caries                           | 7                           | 35.0 | 0            | 0.0  |
| Diarrhoea                               | 2                           | 10.0 | 1            | 5.0  |
| Dizziness                               | 1                           | 5.0  | 1            | 5.0  |
| Eczema                                  | 1                           | 5.0  | 0            | 0.0  |
| Enterocolitis viral                     | 1                           | 5.0  | 0            | 0.0  |

**KRN23 (paediatrics)**  
**N=20**

| PT                          | TEAE |      | Drug-related |     |
|-----------------------------|------|------|--------------|-----|
|                             | n    | (%)  | n            | (%) |
| Epistaxis                   | 1    | 5.0  | 0            | 0.0 |
| Erythema infectiosum        | 2    | 10.0 | 0            | 0.0 |
| Foot fracture               | 1    | 5.0  | 0            | 0.0 |
| Gastroenteritis             | 1    | 5.0  | 0            | 0.0 |
| Hand-foot-and-mouth disease | 1    | 5.0  | 0            | 0.0 |
| Headache                    | 1    | 5.0  | 1            | 5.0 |
| Hordeolum                   | 1    | 5.0  | 0            | 0.0 |
| Impetigo                    | 2    | 10.0 | 0            | 0.0 |
| Influenza                   | 6    | 30.0 | 0            | 0.0 |
| Malocclusion                | 1    | 5.0  | 0            | 0.0 |
| Nasopharyngitis             | 8    | 40.0 | 0            | 0.0 |
| Nausea                      | 1    | 5.0  | 1            | 5.0 |
| Otitis media                | 3    | 15.0 | 0            | 0.0 |
| Periodontitis               | 2    | 10.0 | 0            | 0.0 |
| Pharyngitis                 | 3    | 15.0 | 0            | 0.0 |
| Pyrexia                     | 1    | 5.0  | 0            | 0.0 |
| Rash                        | 1    | 5.0  | 0            | 0.0 |
| Rhinitis                    | 1    | 5.0  | 0            | 0.0 |
| Rhinorrhoea                 | 1    | 5.0  | 0            | 0.0 |

**KRN23 (paediatrics)**  
**N=20**

| PT                                | TEAE |      | Drug-related |     |
|-----------------------------------|------|------|--------------|-----|
|                                   | n    | (%)  | n            | (%) |
| Seasonal allergy                  | 1    | 5.0  | 0            | 0.0 |
| Skin laceration                   | 1    | 5.0  | 0            | 0.0 |
| Swelling face                     | 1    | 5.0  | 0            | 0.0 |
| Syncope                           | 1    | 5.0  | 0            | 0.0 |
| Tonsillar hypertrophy             | 1    | 5.0  | 0            | 0.0 |
| Tonsillitis                       | 1    | 5.0  | 0            | 0.0 |
| Tooth abscess                     | 1    | 5.0  | 0            | 0.0 |
| Tooth development disorder        | 1    | 5.0  | 0            | 0.0 |
| Tooth fracture                    | 1    | 5.0  | 0            | 0.0 |
| Upper respiratory tract infection | 3    | 15.0 | 0            | 0.0 |
| Urticaria                         | 1    | 5.0  | 0            | 0.0 |
| Vascular malformation             | 1    | 5.0  | 0            | 0.0 |
| Visual acuity reduced             | 1    | 5.0  | 0            | 0.0 |



**ADULT DATA**

**KRN23-004 (adults): Baseline characteristics of patients with self-administration**

| <b>Parameter (unit)</b> |        | <b>KRN23 (adults)<br/>N=4</b> |
|-------------------------|--------|-------------------------------|
| Sex                     | Female | 2 (50.0)                      |
|                         | Male   | 2 (50.0)                      |
| Age (yrs)               | n      | 4                             |
|                         | Mean   | 39.3                          |
|                         | SD     | 21.5                          |
|                         | Min    | 21                            |
|                         | Median | 35.5                          |
|                         | Max    | 65                            |
|                         | <65    | 3 (75.0)                      |
|                         | ≥65    | 1 (25.0)                      |
| Weight (kg)             | n      | 4                             |
|                         | Mean   | 51.45                         |
|                         | SD     | 10.68                         |
|                         | Min    | 40.1                          |
|                         | Median | 49.95                         |
|                         | Max    | 65.8                          |
|                         |        |                               |
| Phosphate (mg/dL)       | n      | 4                             |
|                         | Mean   | 1.98                          |
|                         | SD     | 0.43                          |
|                         | Min    | 1.5                           |
|                         | Median | 1.95                          |
|                         | Max    | 2.5                           |
| Calcium (mg/dL)         | n      | 4                             |
|                         | Mean   | 9.40                          |
|                         |        |                               |

| Parameter (unit)                    | KRN23 (adults) |        |
|-------------------------------------|----------------|--------|
|                                     |                | N=4    |
| 1,25(OH) <sub>2</sub> D (pg/mL)     | SD             | 0.36   |
|                                     | Min            | 8.9    |
|                                     | Median         | 9.50   |
|                                     | Max            | 9.7    |
|                                     | n              | 4      |
|                                     | Mean           | 37.23  |
|                                     | SD             | 9.64   |
| Parathyroid hormone, intact (pg/mL) | Min            | 25.1   |
|                                     | Median         | 37.80  |
|                                     | Max            | 48.2   |
|                                     | n              | 4      |
|                                     | Mean           | 78.0   |
|                                     | SD             | 34.8   |
|                                     | Min            | 46     |
| TmP/GFR (2-hour urine) (mg/dL)      | Median         | 77.0   |
|                                     | Max            | 112    |
|                                     | n              | 4      |
|                                     | Mean           | 1.6173 |
|                                     | SD             | 0.3348 |
|                                     | Min            | 1.282  |
|                                     | Median         | 1.5690 |
| Max                                 | 2.049          |        |

### KRN23-004 (adults): Summary of drug exposure of patients with self-administration

| Parameter (unit)             |        | KRN23 (adults)<br>N=4 |
|------------------------------|--------|-----------------------|
| Duration of treatment (week) | n      | 4                     |
|                              | Mean   | 102.05                |
|                              | SD     | 3.90                  |
|                              | Min    | 100.1                 |
|                              | Median | 100.10                |
|                              | Max    | 107.9                 |
| Dose per 4 weeks             | n      | 4                     |
|                              | Mean   | 46.973                |
|                              | SD     | 26.739                |
|                              | Min    | 9.35                  |
|                              | Median | 52.960                |
|                              | Max    | 72.62                 |

**KRN23-004 (adults): Serum phosphate over time of patients with self-administration**

| Parameter (unit)  | Visit    | KRN23 (adults) |        |
|-------------------|----------|----------------|--------|
|                   |          | N=4            | Actual |
| Phosphate (mg/dL) | Baseline | n              | 4      |
|                   |          | Mean           | 1.98   |
|                   |          | SD             | 0.43   |
|                   |          | Min            | 1.5    |
|                   |          | Median         | 1.95   |
|                   |          | Max            | 2.5    |
|                   | Week 8   | n              | 4      |
|                   |          | Mean           | 2.15   |
|                   |          | SD             | 0.45   |
|                   |          | Min            | 1.8    |
|                   |          | Median         | 2.00   |
|                   |          | Max            | 2.8    |
|                   | Week 16  | n              | 4      |
|                   |          | Mean           | 2.33   |
|                   |          | SD             | 0.43   |
|                   |          | Min            | 1.9    |
|                   |          | Median         | 2.25   |
|                   |          | Max            | 2.9    |
|                   | Week 24  | n              | 3      |
|                   |          | Mean           | 2.30   |
| SD                |          | 0.44           |        |
| Min               |          | 2.0            |        |
| Median            |          | 2.10           |        |
| Max               |          | 2.8            |        |

| Parameter (unit)  | Visit   | KRN23 (adults) |        |
|-------------------|---------|----------------|--------|
|                   |         | N=4            | Actual |
| Phosphate (mg/dL) | Week 32 | n              | 4      |
|                   |         | Mean           | 2.20   |
|                   |         | SD             | 0.61   |
|                   |         | Min            | 1.6    |
|                   |         | Median         | 2.10   |
|                   |         | Max            | 3.0    |
|                   | Week 40 | n              | 4      |
|                   |         | Mean           | 2.05   |
|                   |         | SD             | 0.45   |
|                   |         | Min            | 1.7    |
|                   |         | Median         | 1.90   |
|                   |         | Max            | 2.7    |
|                   | Week 48 | n              | 4      |
|                   |         | Mean           | 2.13   |
|                   |         | SD             | 0.59   |
|                   |         | Min            | 1.3    |
|                   |         | Median         | 2.25   |
|                   |         | Max            | 2.7    |
|                   | Week 56 | n              | 4      |
|                   |         | Mean           | 2.35   |
| SD                |         | 0.47           |        |
| Min               |         | 1.9            |        |
| Median            |         | 2.35           |        |
| Max               |         | 2.8            |        |

| Parameter (unit)  | Visit   | KRN23 (adults) |        |
|-------------------|---------|----------------|--------|
|                   |         | N=4            | Actual |
| Phosphate (mg/dL) | Week 64 | n              | 3      |
|                   |         | Mean           | 2.47   |
|                   |         | SD             | 0.74   |
|                   |         | Min            | 1.9    |
|                   |         | Median         | 2.20   |
|                   |         | Max            | 3.3    |
|                   | Week 72 | n              | 4      |
|                   |         | Mean           | 2.13   |
|                   |         | SD             | 0.58   |
|                   |         | Min            | 1.5    |
|                   |         | Median         | 2.05   |
|                   |         | Max            | 2.9    |
|                   | Week 80 | n              | 4      |
|                   |         | Mean           | 2.28   |
|                   |         | SD             | 0.78   |
|                   |         | Min            | 1.6    |
|                   |         | Median         | 2.05   |
|                   |         | Max            | 3.4    |
|                   | Week 88 | n              | 4      |
|                   |         | Mean           | 2.10   |
| SD                |         | 0.48           |        |
| Min               |         | 1.8            |        |
| Median            |         | 1.90           |        |
| Max               |         | 2.8            |        |

| Parameter (unit)  | Visit        | KRN23 (adults) |        |
|-------------------|--------------|----------------|--------|
|                   |              | N=4            | Actual |
| Phosphate (mg/dL) | Week 96      | n              | 4      |
|                   |              | Mean           | 2.13   |
|                   |              | SD             | 0.74   |
|                   |              | Min            | 1.2    |
|                   |              | Median         | 2.15   |
|                   |              | Max            | 3.0    |
|                   | Week 104     | n              | 1      |
|                   |              | Mean           | 2.20   |
|                   |              | SD             | -      |
|                   |              | Min            | 2.2    |
|                   |              | Median         | 2.20   |
|                   |              | Max            | 2.2    |
|                   | End of study | n              | 4      |
|                   |              | Mean           | 2.43   |
|                   |              | SD             | 0.47   |
|                   |              | Min            | 2.0    |
|                   |              | Median         | 2.30   |
|                   |              | Max            | 3.1    |

**KRN23-004 (adults): TmP/GFR over time of patients with self-administration**

| Parameter       | Visit                |                | Statistics | KRN23-004<br>(N=4) |
|-----------------|----------------------|----------------|------------|--------------------|
| TmP/GFR (mg/dL) | Baseline             | Observed value | n          | 4                  |
|                 |                      |                | Mean       | 1.617              |
|                 |                      |                | Median     | 1.569              |
|                 |                      |                | SD         | 0.3348             |
|                 |                      |                | Min        | 1.28               |
|                 |                      |                | Max        | 2.05               |
|                 | Week 48              | Observed value | n          | 4                  |
|                 |                      |                | Mean       | 1.893              |
|                 |                      |                | Median     | 1.955              |
|                 |                      |                | SD         | 0.7453             |
|                 |                      |                | Min        | 0.93               |
|                 |                      |                | Max        | 2.73               |
|                 | Change from baseline |                | n          | 4                  |
|                 |                      |                | Mean       | 0.276              |
|                 |                      |                | Median     | 0.410              |
|                 |                      |                | SD         | 0.5977             |
|                 |                      |                | Min        | -0.51              |
|                 |                      |                | Max        | 0.79               |



| Parameter            | Visit                |                | Statistics | KRN23-004<br>(N=4) |
|----------------------|----------------------|----------------|------------|--------------------|
| TmP/GFR (mg/dL)      | Week 96              | Observed value | n          | 4                  |
|                      |                      |                | Mean       | 2.000              |
|                      |                      |                | Median     | 2.116              |
|                      |                      |                | SD         | 0.8019             |
|                      |                      |                | Min        | 0.97               |
|                      |                      |                | Max        | 2.80               |
|                      | Change from baseline | n              | 4          |                    |
|                      |                      | Mean           | 0.383      |                    |
|                      |                      | Median         | 0.434      |                    |
|                      |                      | SD             | 0.7116     |                    |
|                      |                      | Min            | -0.48      |                    |
|                      |                      | Max            | 1.14       |                    |
|                      | End of study         | Observed value | n          | 4                  |
|                      |                      |                | Mean       | 2.281              |
|                      |                      |                | Median     | 2.137              |
|                      |                      |                | SD         | 0.6764             |
|                      |                      |                | Min        | 1.72               |
|                      |                      |                | Max        | 3.13               |
| Change from baseline | n                    | 4              |            |                    |
|                      | Mean                 | 0.664          |            |                    |
|                      | Median               | 0.680          |            |                    |
|                      | SD                   | 0.5813         |            |                    |
|                      | Min                  | 0.06           |            |                    |
|                      | Max                  | 1.23           |            |                    |

**KRN23-004 (adults): 1,25(OH)<sub>2</sub>D over time of patients with self-administration**

| Parameter (unit)                | Visit    | KRN23 (adults) |        |
|---------------------------------|----------|----------------|--------|
|                                 |          | N=4            | Actual |
| 1,25(OH) <sub>2</sub> D (pg/mL) | Baseline | n              | 4      |
|                                 |          | Mean           | 37.23  |
|                                 |          | SD             | 9.64   |
|                                 |          | Min            | 25.1   |
|                                 |          | Median         | 37.80  |
|                                 |          | Max            | 48.2   |
|                                 | Week 16  | n              | 4      |
|                                 |          | Mean           | 51.78  |
|                                 |          | SD             | 11.79  |
|                                 |          | Min            | 39.9   |
|                                 |          | Median         | 49.60  |
|                                 |          | Max            | 68.0   |
|                                 | Week 32  | n              | 4      |
|                                 |          | Mean           | 68.90  |
|                                 |          | SD             | 42.72  |
|                                 |          | Min            | 42.5   |
|                                 |          | Median         | 50.55  |
|                                 |          | Max            | 132.0  |
|                                 | Week 48  | n              | 4      |
|                                 |          | Mean           | 47.43  |
| SD                              |          | 8.06           |        |
| Min                             |          | 38.6           |        |
| Median                          |          | 47.85          |        |
| Max                             |          | 55.4           |        |

| Parameter (unit)                | Visit        | KRN23 (adults) |        |
|---------------------------------|--------------|----------------|--------|
|                                 |              | N=4            | Actual |
| 1,25(OH) <sub>2</sub> D (pg/mL) | Week 64      | n              | 3      |
|                                 |              | Mean           | 50.70  |
|                                 |              | SD             | 19.05  |
|                                 |              | Min            | 30.6   |
|                                 |              | Median         | 53.00  |
|                                 |              | Max            | 68.5   |
|                                 | Week 80      | n              | 4      |
|                                 |              | Mean           | 47.03  |
|                                 |              | SD             | 18.17  |
|                                 |              | Min            | 32.3   |
|                                 |              | Median         | 41.25  |
|                                 |              | Max            | 73.3   |
|                                 | Week 96      | n              | 4      |
|                                 |              | Mean           | 47.78  |
|                                 |              | SD             | 13.86  |
|                                 |              | Min            | 30.3   |
|                                 |              | Median         | 48.90  |
|                                 |              | Max            | 63.0   |
|                                 | End of study | n              | 4      |
|                                 |              | Mean           | 45.35  |
| SD                              |              | 6.34           |        |
| Min                             |              | 37.5           |        |
| Median                          |              | 46.65          |        |
| Max                             |              | 50.6           |        |

**KRN23-004 (adults): Overall summary of treatment-emergent adverse events (TEAE) of patients with self-administration**

|                                     | KRN23 (adults) |        |
|-------------------------------------|----------------|--------|
|                                     | N=4            |        |
|                                     | n              | (%)    |
| Subjects with any TEAE              | 3              | (75.0) |
| Death                               | 0              |        |
| Other serious                       | 1              | (25.0) |
| Other significant                   | 0              |        |
| Subjects with any drug-related TEAE | 0              |        |
| Death                               | 0              |        |
| Other serious                       | 0              |        |
| Other significant                   | 0              |        |

**KRN23-004 (adults): Summary of adverse events by System Organ Class and preferred term of patients with self-administration**

| <b>System Organ Class<br/>Preferred term</b>    | <b>KRN23<br/>N=4</b> |
|-------------------------------------------------|----------------------|
| Subjects with any TEAE                          | 3 (75.0)             |
| Gastrointestinal disorders                      | 2 (50.0)             |
| Dental caries                                   | 1 (25.0)             |
| Gastritis                                       | 1 (25.0)             |
| Nausea                                          | 1 (25.0)             |
| Infections and infestations                     | 2 (50.0)             |
| Appendicitis                                    | 1 (25.0)             |
| Influenza                                       | 1 (25.0)             |
| Nasopharyngitis                                 | 2 (50.0)             |
| Pneumonia                                       | 1 (25.0)             |
| Upper respiratory tract infection               | 1 (25.0)             |
| Musculoskeletal and connective tissue disorders | 1 (25.0)             |
| Arthralgia                                      | 1 (25.0)             |
| Nervous system disorders                        | 1 (25.0)             |
| Headache                                        | 1 (25.0)             |
| Skin and subcutaneous tissue disorders          | 1 (25.0)             |
| Rash                                            | 1 (25.0)             |
